# Supplementary material
Source: PubMed Central journal article supplement (PMC2937893)

Figure S1

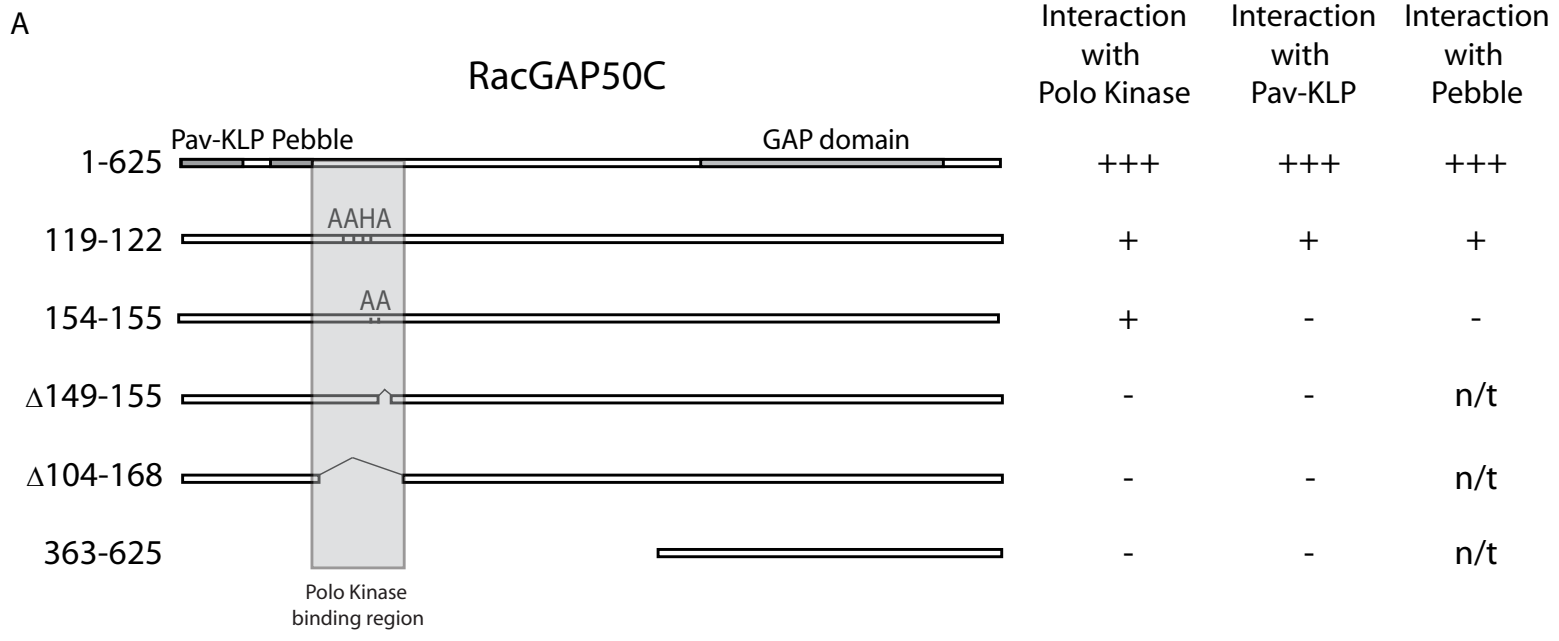

**B**

```

Polo Dm 316  ngirpddtr1estfl-----kanlhdaitasaqvcrhssedyrsdieslyqq1tnlingkprilqgnlgde
Plk Ag  317  nga-gdetrfessfl-----knnlhdpitasmisrhndtyradietlhreltklflakparlasnldde
Plk Dr  331  --nkgtdspieemgkmdqpqrredlqqrddgpeqpdtltd-----mlqq1lavvnaakpsdrdfirqee
Plk Hs  344  --nkg1enplper----prekeepvvretgevvdchlsd-----mlqq1hsvnaskpserglvrqee
Plk Mm  344  --nkgvenplpdr----prekeepvvretneaiechlsd-----llqq1tsvnaskpserglvrqee
Plk XI  335  --nkgqdsplvekq-svpakeeemqqpestepadcy1se-----mlqq1tcvnavkpseravirqee
    
```

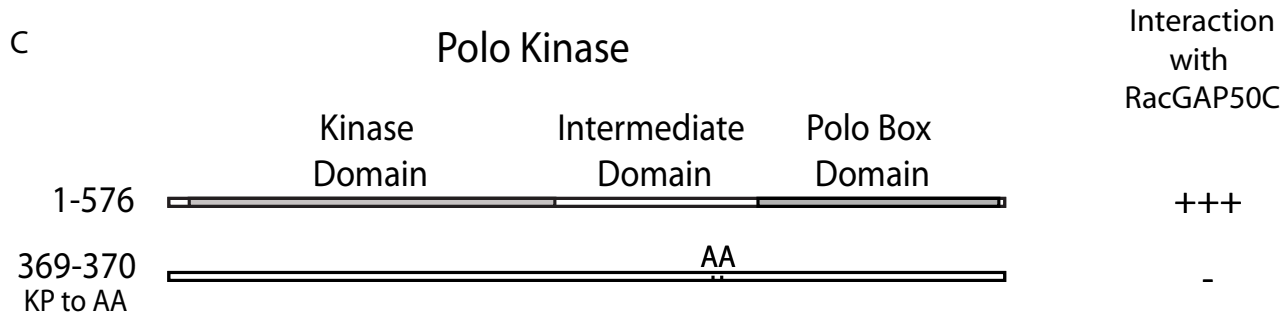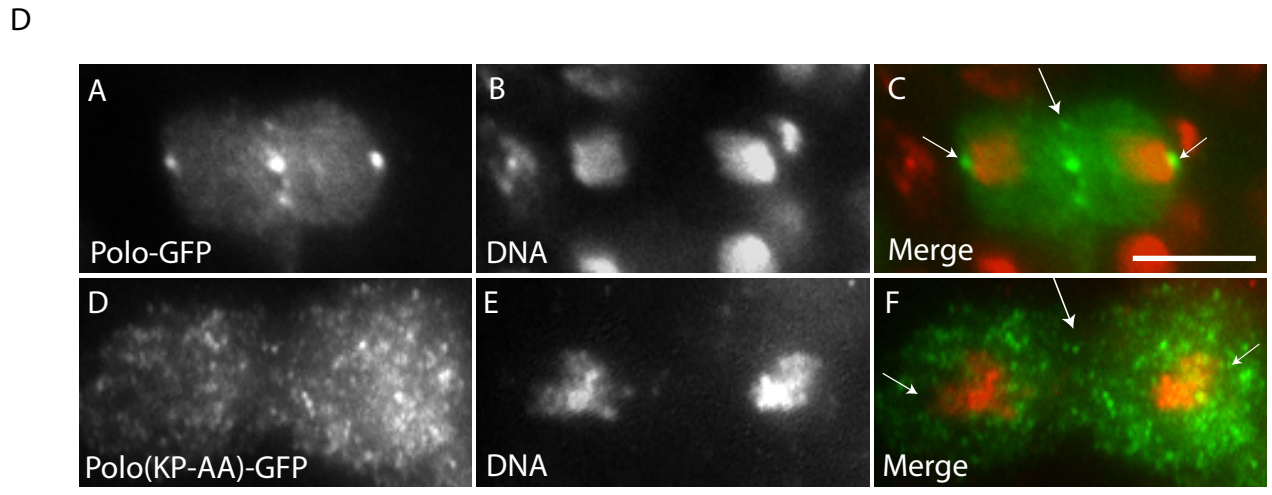

Supplement: supp_M110.103887_jbc.M110.103887-7.pdf [file supp_M110.103887_jbc.M110.103887-7.pdf]
