# Supplementary material
Source: PubMed Central journal article supplement (PMC2937893)

Figure S3

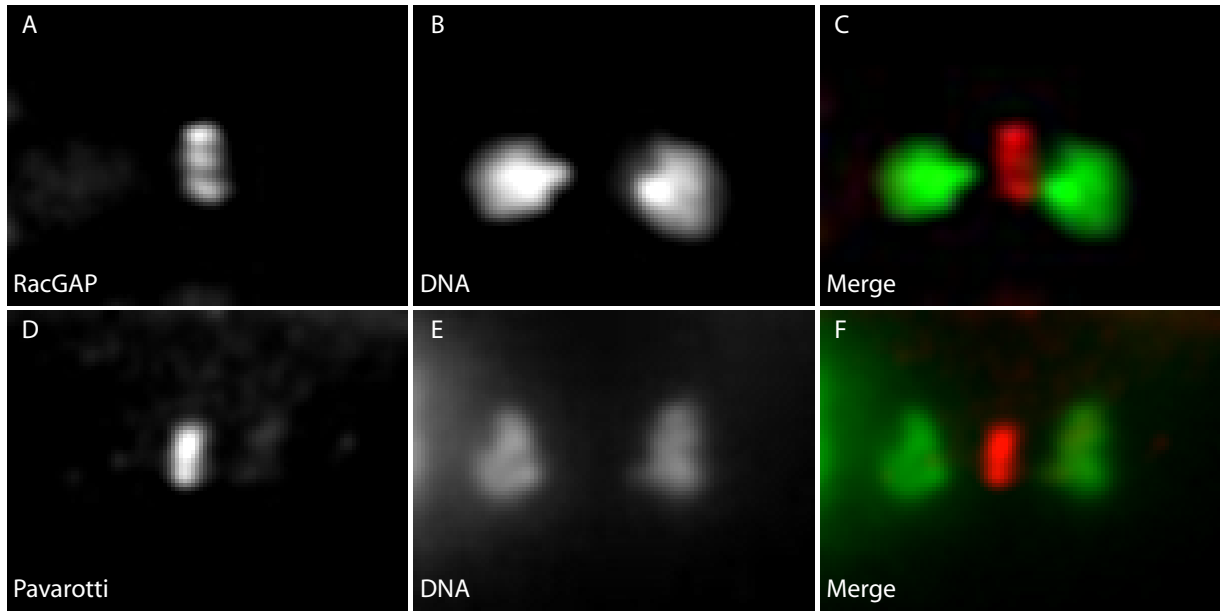

Supplement: supp_M110.103887_jbc.M110.103887-8.pdf [file supp_M110.103887_jbc.M110.103887-8.pdf]

Figure S4

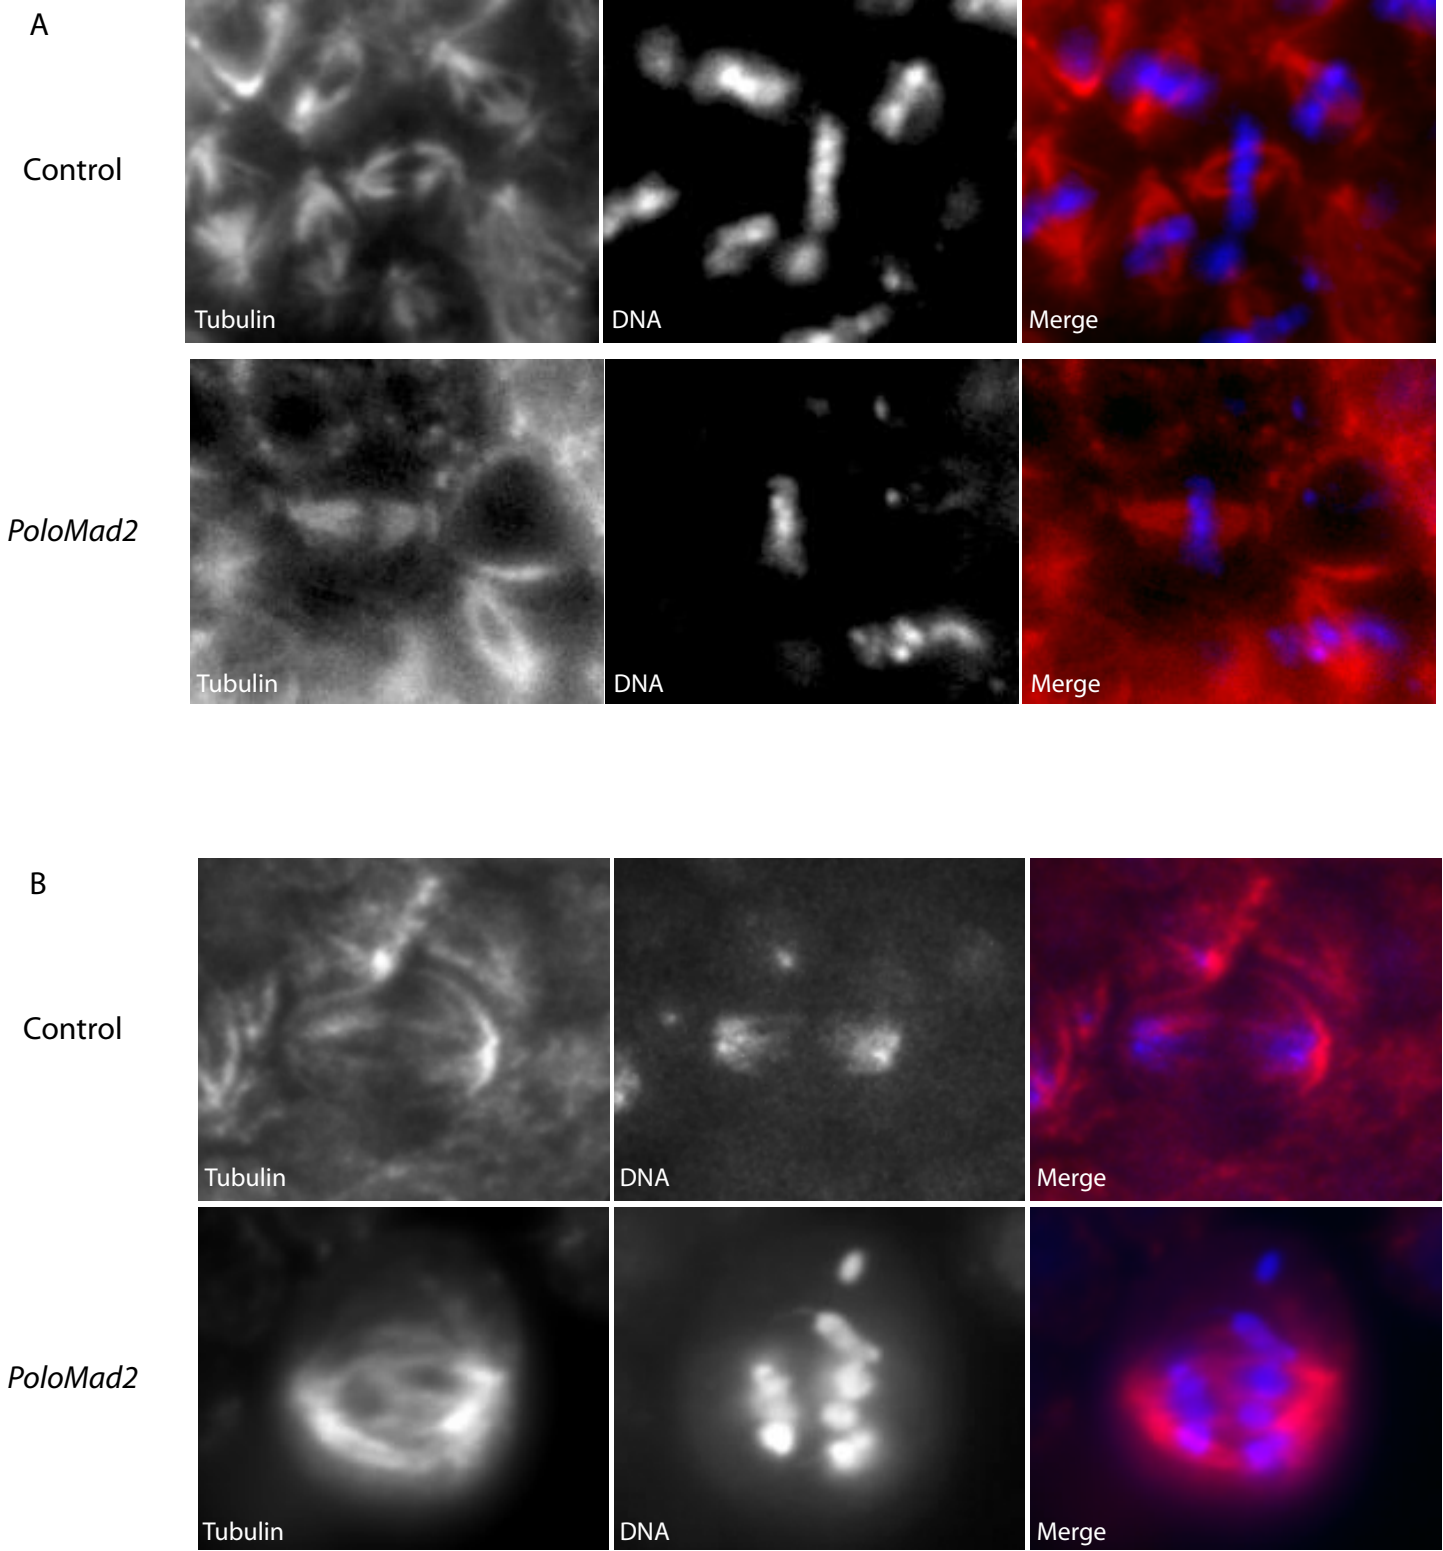

Supplement: supp_M110.103887_jbc.M110.103887-9.pdf [file supp_M110.103887_jbc.M110.103887-9.pdf]
